# Supplementary material
Source: PubMed Central journal article supplement (PMC8417396)
Supplement: mmc1.pdf [file mmc1.pdf]

**iScience, Volume 24**

**Supplemental information**

**Epitope diversity of SARS-CoV-2 hyperimmune  
intravenous human immunoglobulins and  
neutralization of variants of concern**

**Juanjie Tang, Yuri Lee, Supriya Ravichandran, Gabrielle Grubbs, Chang Huang, Charles B. Staft, Tony Wang, Basil Golding, Hana Golding, and Surender Khurana**

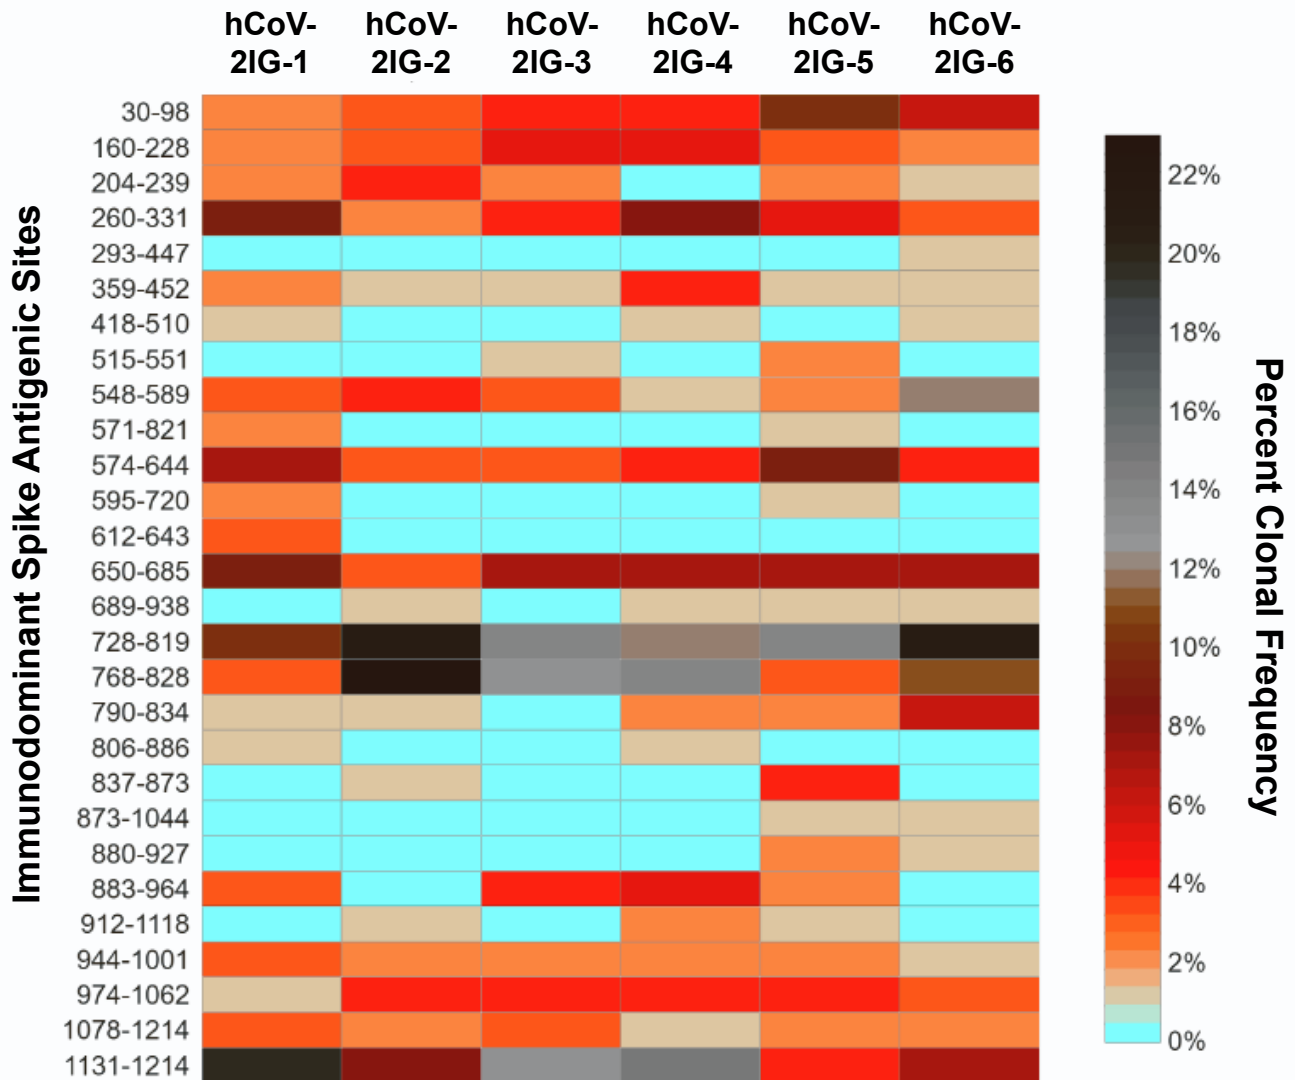

**Figure S1. SARS-CoV-2 epitope profile of six hCoV-2IG batches by GFPDL analyses. Related to Figure 1.** Heat map of immunodominant sites ( $\geq 3$  clonal frequency in at least one hCoV-2IG lot) on the SARS-CoV-2 spike recognized by IgG antibodies in six hCoV-2IG lots identified using GFPDL analyses. The immunodominant sites on the left indicate amino acid residue of the antigenic sites in the spike protein. Color scale on the right represents range of percentage of clonal occurrences (frequency) of each site. Heat map was generated using R package.



**Table S1: Sequence conservation of GFPDL-identified antigenic regions/sites among different SARS-CoV-2 VOCs\* Related to Figure 1 and Figure 2.**

| AA        | Sequence                                                                                                                                                                                                                                                                                                         | WA-1 | CA (B.1.429) | UK (B.1.1.7) | JP (P.1) | SA (B.1.351) |
|-----------|------------------------------------------------------------------------------------------------------------------------------------------------------------------------------------------------------------------------------------------------------------------------------------------------------------------|------|--------------|--------------|----------|--------------|
| 30-98     | NSFTRGVVYPDKVFRSSVLHSTQDLFLPFFSNVTFWFAIHVSGTNGTKRFDNPLVFNDFGVYFASTEKS                                                                                                                                                                                                                                            | 100  | 100          | 97.1         | 100      | 98.5         |
| 160-228   | YSSANNCTFEYVYQPFMLDLEGGKQGNFKNLREFVFKNIDGYFKIYKSHKHTPINLVRDLPGGFSALEPLVD                                                                                                                                                                                                                                         | 100  | 100          | 100          | 98.5     | 98.5         |
| 204-239   | YSKHTPINLVRDLPGGFSALEPLVDLPIGINITRFQ                                                                                                                                                                                                                                                                             | 100  | 100          | 100          | 100      | 97.2         |
| 260-331   | AGAAAYVGYLQPRTFLLKYNENGTITDAVDCALDPLSEKCTLKSFTVEKGIYQTSNFRVQPTESIVRFPN<br>LDPLSEKCTLKSFTVEKGIYQTSNFRVQPTESIVRFPNITLCPGGEVFNATRFASVYAWNRKRISNCVADYSVLY                                                                                                                                                            | 100  | 100          | 100          | 100      | 100          |
| 293-447   | NSASFSTFKCYGVSPKLNLDLCTFNVYADSFVIRGDEVRIAPGQTKGIADYNYKLPDDFTGCVIWNSNLDLSDK<br>VGG                                                                                                                                                                                                                                | 100  | 100          | 100          | 99.3     | 99.3         |
| 359-452   | SNCVADYSVLYNSASFSTFKCYGVSPKLNLDLCTFNVYADSFVIRGDEVRIAPGQTKGIADYNYKLPDDFTGCVI<br>AWNSNLDLSDKVGNNYLY                                                                                                                                                                                                                | 100  | 98.9         | 100          | 98.9     | 98.9         |
| 418-510   | IADYNYKLPDDFTGCVIWNSNLDLSDKVGNNYLYRFLFRKSNLKPFFERDISTEIQAGSTPCNGVEGFNCFYPL<br>QSYGFQPTNGVGYQPYRV                                                                                                                                                                                                                 | 100  | 98.9         | 98.9         | 97.8     | 97.8         |
| 515-551   | FELLHAPATVCGPKKSTNLVKNKCNVFNFLGTGTGV                                                                                                                                                                                                                                                                             | 100  | 100          | 100          | 100      | 100          |
| 548-589   | GTGVLTESNKKFLPFQQRDIADTTDAVRDPQTEILDITP<br>DTTDAVRDPQTEILDITPCSFVGGVSVITPGTNTSNQVAVLYQDVNCTEVPVAIHADQLTPTWRVYSTGNSVFQTR<br>AGCLIGAEHVNNNSYECDIPIGAGICASYQTQNSPRRARSVASQSIIAYTMSLGAENSVAYSNNIAIPTNFTISVTT<br>EILPVSMTKTSVDCTMYICGDSTECSNLLQYGSFCTQLNRALTGIAVEQDKNTQEVFAVQKQIYKTPPIKDFGGF<br>NFSQILPDPSPKSKRSFIEDL | 100  | 99.6         | 98.8         | 99.2     | 99.2         |
| 574-644   | DAVRDPQTEILDITPCSFVGGVSVITPGTNTSNQVAVLYQDVNCTEVPVAIHADQLTPTWRVYSTGNSVFQ<br>VSVITPGTNTSNQVAVLYQDVNCTEVPVAIHADQLTPTWRVYSTGNSVFQTRAGCLIGAEHVNNNSYECDIPIGAGI<br>CASYQTQNSPRRARSVASQSIIAYTMSLGAENSVAYSNNIAIPTNFTI                                                                                                     | 100  | 98.5         | 98.5         | 98.5     | 98.5         |
| 595-720   | YQDVNCTEVPVAIHADQLTPTWRVYSTGNSVF                                                                                                                                                                                                                                                                                 | 100  | 99.2         | 97.6         | 98.4     | 98.4         |
| 612-643   | YQDVNCTEVPVAIHADQLTPTWRVYSTGNSVF                                                                                                                                                                                                                                                                                 | 100  | 96.8         | 96.8         | 96.8     | 96.8         |
| 650-685   | LIGAEHVNNNSYECDIPIGAGICASYQTQNSPRRAR<br>SOSIIAYTMSLGAENSVAYSNNIAIPTNFTISVTTTELIPVSMTKTSVDCTMYICGDSTECSNLLQYGSFCTQLNR<br>LTGIAVEQDKNTQEVFAVQKQIYKTPPIKDFGGFNFSQILPDPSPKSKRSFIEDLLFNKVTLDAGFIKQYGDCLGDI<br>AARDLCAQKFNGLTVLPPLLTDEMIAYTSALLAGTITSGWTFGAGAALQIPFAMQMAYRFGIGVTVQNVLYENQ<br>KLIANQFNLSAIGKIQDLSL      | 100  | 100          | 97.2         | 97.2     | 100          |
| 689-938   | LTGIAVEQDKNTQEVFAVQKQIYKTPPIKDFGGFNFSQILPDPSPKSKRSFIEDLLFNKVTLDAGFIKQYGDCLGDI<br>AARDLCAQKFNGLTVLPPLLTDEMIAYTSALLAGTITSGWTFGAGAALQIPFAMQMAYRFGIGVTVQNVLYENQ<br>KLIANQFNLSAIGKIQDLSL                                                                                                                              | 100  | 100          | 99.6         | 100      | 99.6         |
| 728-819   | PVSMTKTSVDCTMYICGDSTECSNLLQYGSFCTQLNRALTGIAVEQDKNTQEVFAVQKQIYKTPPIKDFGGFNFS<br>QILPDPSPKSKRSFIE                                                                                                                                                                                                                  | 100  | 100          | 100          | 100      | 100          |
| 768-828   | TGIAVEQDKNTQEVFAVQKQIYKTPPIKDFGGFNFSQILPDPSPKSKRSFIEDLLFNKVTL                                                                                                                                                                                                                                                    | 100  | 100          | 100          | 100      | 100          |
| 790-834   | KTPPIKDFGGFNFSQILPDPSPKSKRSFIEDLLFNKVTLDAGFI                                                                                                                                                                                                                                                                     | 100  | 100          | 100          | 100      | 100          |
| 806-886   | KRSFIEDLLFNKVTLDAGFIKQYGDCLGDIARDLCAQKFNGLTVLPPLLTDEMIAYTSALLAGTITSGW                                                                                                                                                                                                                                            | 100  | 100          | 100          | 100      | 100          |
| 837-873   | YGDCLGDIARDLCAQKFNGLTVLPPLLTDEMIAY<br>YTSALLAGTITSGWTFGAGAALQIPFAMQMAYRFGIGVTVQNVLYENQKLIANQFNLSAIGKIQDLSLSTASALGKLQ<br>DVVNQNAQALNTLVKQLSSNFGAISVNLNLDLRLDKVEAEVQIDRLITGRQLSQTYYTQQLIRAAEIRASANLAAT<br>KMSECVLGQSKRVDFCG                                                                                        | 100  | 100          | 100          | 100      | 100          |
| 873-1044  | DVVNQNAQALNTLVKQLSSNFGAISVNLNLDLRLDKVEAEVQIDRLITGRQLSQTYYTQQLIRAAEIRASANLAAT<br>KMSECVLGQSKRVDFCG                                                                                                                                                                                                                | 100  | 100          | 100          | 100      | 100          |
| 880-927   | GTITSGWTFGAGAALQIPFAMQMAYRFGIGVTVQNVLYENQKLIANQF                                                                                                                                                                                                                                                                 | 100  | 100          | 100          | 100      | 100          |
| 883-964   | TSGWTFGAGAALQIPFAMQMAYRFGIGVTVQNVLYENQKLIANQFNLSAIGKIQDLSLSTASALGKLQDVVNQNAQ<br>ALNTLVK                                                                                                                                                                                                                          | 100  | 100          | 100          | 100      | 100          |
| 912-1118  | TQNVLYENQKLIANQFNLSAIGKIQDLSLSTASALGKLQDVVNQNAQALNTLVKQLSSNFGAISVNLNLDLRLDKVE<br>AEVQIDRLITGRQLSQTYYTQQLIRAAEIRASANLAATKMSECVLGQSKRVDFCGKGYHLSFPQSAPHGVVFLH<br>VTYVPAQEKNFITTAICHGDKAHFPREGVVFVSNNGTHWVFTQRNFYEPQIITD                                                                                            | 100  | 100          | 99           | 99.5     | 100          |
| 944-1001  | ALGKLDVVNQNAQALNTLVKQLSSNFGAISVNLNLDLRLDKVEAEVQIDRLITGRQLSQTYYTQQLIRAAEIRASANLAAT<br>KMSECVLGQSKRVDFCGKGYHLSFPQSAPHGVVFLH                                                                                                                                                                                        | 100  | 100          | 98.2         | 100      | 100          |
| 974-1062  | SSVNLNLDLRLDKVEAEVQIDRLITGRQLSQTYYTQQLIRAAEIRASANLAATKMSECVLGQSKRVDFCGKGYHLSFPQSAPHGVVFLH<br>MSFPQSAPHGVVFLH                                                                                                                                                                                                     | 100  | 100          | 98.8         | 98.8     | 100          |
| 1078-1214 | APAICHGDKAHFPREGVVFVSNNGTHWVFTQRNFYEPQIITDNTFVSGNCDVIGVNNTVYDPLQPELDSFKEELD<br>KYFKNHTSPDVLGDISGINASVNIQKEIDRLNEVAKNLSLIDLQELGKYEYKWPW                                                                                                                                                                           | 100  | 100          | 99.2         | 99.2     | 100          |
| 1131-1214 | GIVNNTVYDPLQPELDSFKEELDKYFKNHTSPDVLGDISGINASVNIQKEIDRLNEVAKNLSLIDLQELGKYEYKWPW<br>QYIKWPW                                                                                                                                                                                                                        | 100  | 100          | 100          | 98.8     | 100          |

\*Percent sequence conservation of GFPDL identified antigenic sites in the spike protein of SARS-CoV-2 variants namely WA-1 strain (QI187782.1), CA variant (B.1.429, EPI\_ISL\_648527), UK variant (B.1.1.7, QQQ47833.1), JP variant (P.1, QRX39425.1), and SA variant (B.1.351, EPI\_ISL\_678597) was calculated using Sequence Identity Matrix function in BioEdit.

**Table S2: SARS-CoV-2 variants mutations introduced in the spike plasmid for production of SARS-CoV-2 pseudovirions to test them in PsVNA.  
Related to Figure 2.**

| <b>Mutations constructed in the spike plasmids</b> |                                                                                   |
|----------------------------------------------------|-----------------------------------------------------------------------------------|
| <b>CA</b>                                          | S13I, W152C, L452R, D614G                                                         |
| <b>UK</b>                                          | Del69-70, Del145,N501Y, A570D, D614G, P681H, T716I, S982A, D1118H                 |
| <b>JP</b>                                          | L18F, T20N, P26S, D138Y, R190S, K417T, E484K, N501Y, H655Y, T1027I, D614G, V1176F |
| <b>SA</b>                                          | L18F, D80A, D215G, Del242-244, K417N, E484K, N501Y, D614G, A701V                  |

**Table S3: Neutralization titers of convalescent plasma, I2019-VIG and hCoV-2IG against SARS-CoV-2 variants\* Related to Figure 2.**

|                                                                           | WA-1    |         | CA      |         | UK      |         | JP      |         | SA      |         |
|---------------------------------------------------------------------------|---------|---------|---------|---------|---------|---------|---------|---------|---------|---------|
|                                                                           | PsVNA50 | PsVNA80 |
| <b>IVIG batches produced in 2019 prior to COVID-19</b>                    |         |         |         |         |         |         |         |         |         |         |
| 2019-IVIG-1                                                               | <20     | <20     | <20     | <20     | <20     | <20     | <20     | <20     | <20     | <20     |
| 2019-IVIG-2                                                               | <20     | <20     | <20     | <20     | <20     | <20     | <20     | <20     | <20     | <20     |
| 2019-IVIG-3                                                               | <20     | <20     | <20     | <20     | <20     | <20     | <20     | <20     | <20     | <20     |
| 2019-IVIG-4                                                               | <20     | <20     | <20     | <20     | <20     | <20     | <20     | <20     | <20     | <20     |
| 2019-IVIG-5                                                               | <20     | <20     | <20     | <20     | <20     | <20     | <20     | <20     | <20     | <20     |
| 2019-IVIG-6                                                               | <20     | <20     | <20     | <20     | <20     | <20     | <20     | <20     | <20     | <20     |
| 2019-IVIG-7                                                               | <20     | <20     | <20     | <20     | <20     | <20     | <20     | <20     | <20     | <20     |
| 2019-IVIG-8                                                               | <20     | <20     | <20     | <20     | <20     | <20     | <20     | <20     | <20     | <20     |
| 2019-IVIG-9                                                               | <20     | <20     | <20     | <20     | <20     | <20     | <20     | <20     | <20     | <20     |
| 2019-IVIG-10                                                              | <20     | <20     | <20     | <20     | <20     | <20     | <20     | <20     | <20     | <20     |
| 2019-IVIG-11                                                              | <20     | <20     | <20     | <20     | <20     | <20     | <20     | <20     | <20     | <20     |
| 2019-IVIG-12                                                              | <20     | <20     | <20     | <20     | <20     | <20     | <20     | <20     | <20     | <20     |
| 2019-IVIG-13                                                              | <20     | <20     | <20     | <20     | <20     | <20     | <20     | <20     | <20     | <20     |
| 2019-IVIG-14                                                              | <20     | <20     | <20     | <20     | <20     | <20     | <20     | <20     | <20     | <20     |
| 2019-IVIG-15                                                              | <20     | <20     | <20     | <20     | <20     | <20     | <20     | <20     | <20     | <20     |
| 2019-IVIG-16                                                              | <20     | <20     | <20     | <20     | <20     | <20     | <20     | <20     | <20     | <20     |
| <b>Convalescent plasma batches produced from COVID-19 survivors</b>       |         |         |         |         |         |         |         |         |         |         |
| CP-1                                                                      | 243.1   | 28.0    | 24.7    | <20     | 53.4    | <20     | 287.0   | 61.1    | 107.4   | 30.6    |
| CP-2                                                                      | 369.2   | 56.8    | 122.9   | 30.0    | 128.3   | 23.9    | 126.0   | 24.7    | 25.5    | <20     |
| CP-3                                                                      | 204.9   | 30.1    | 146.9   | 37.3    | 168.4   | 24.0    | 112.0   | 27.3    | 47.2    | <20     |
| CP-4                                                                      | 268.0   | 31.3    | 92.8    | <20     | 59.8    | <20     | 53.8    | <20     | <20     | <20     |
| CP-5                                                                      | <20     | <20     | <20     | <20     | <20     | <20     | <20     | <20     | <20     | <20     |
| CP-6                                                                      | 211.1   | 47.2    | 123.3   | 26.1    | 64.8    | 21.6    | <20     | <20     | <20     | <20     |
| CP-7                                                                      | 67.0    | <20     | 98.5    | 22.2    | 36.6    | <20     | 24.1    | <20     | <20     | <20     |
| CP-8                                                                      | 119.6   | 30.2    | 156.8   | 33.0    | 35.4    | <20     | <20     | <20     | <20     | <20     |
| CP-9                                                                      | 852.7   | 74.9    | 191.0   | 55.6    | 100.7   | 35.4    | 122.6   | 25.4    | 51.7    | <20     |
| <b>hCoV-2IG batches produced from COVID-19 convalescent plasma donors</b> |         |         |         |         |         |         |         |         |         |         |
| hCoV-2IG-1                                                                | 2878.8  | 515.0   | 2009.3  | 613.7   | 1799.4  | 401.1   | 672.2   | 269.1   | 382.0   | 154.5   |
| hCoV-2IG-2                                                                | 2919.7  | 435.0   | 1301.5  | 305.8   | 1224.9  | 394.0   | 681.7   | 235.8   | 259.0   | 119.5   |
| hCoV-2IG-3                                                                | 3309.1  | 593.2   | 2081.3  | 495.7   | 1957.1  | 499.1   | 833.4   | 302.2   | 278.0   | 124.1   |
| hCoV-2IG-4                                                                | 1514.5  | 292.9   | 1257.8  | 261.8   | 935.6   | 286.8   | 653.3   | 176.7   | 184.5   | 80.5    |
| hCoV-2IG-5                                                                | 1590.1  | 323.0   | 1295.7  | 341.2   | 1288.5  | 402.4   | 832.3   | 280.8   | 333.6   | 39.7    |
| hCoV-2IG-6                                                                | 1239.5  | 168.3   | 440.8   | 144.4   | 473.4   | 126.8   | 298.5   | 65.2    | 105.6   | 33.5    |

\*PsVNA titer Cut-off value: 1:20.

**Table S4: PRNT50 and PRNT90 of the six hCoV-2IG batches against SARS-CoV-2 WA-1, UK and SA strains in classical wild-type SARS-CoV-2 virus neutralization assay. Related to Figure 2.**

|                   | WA-1   |        | UK     |        | SA     |        |
|-------------------|--------|--------|--------|--------|--------|--------|
|                   | PRNT50 | PRNT90 | PRNT50 | PRNT90 | PRNT50 | PRNT90 |
| <b>hCoV-2IG-1</b> | 5184.7 | 1723.8 | 2324.7 | 730.1  | 1111.4 | 296.1  |
| <b>hCoV-2IG-2</b> | 2260.6 | 264.4  | 1826.4 | 405.6  | 553.7  | 200.3  |
| <b>hCoV-2IG-3</b> | 4030   | 1504   | 1556.8 | 463.5  | 486.4  | 130.5  |
| <b>hCoV-2IG-4</b> | 3580.7 | 1153.8 | 1336.9 | 298.6  | 361    | 79.3   |
| <b>hCoV-2IG-5</b> | 1929.1 | 803.8  | 1674.6 | 370.8  | 716    | 194.3  |
| <b>hCoV-2IG-6</b> | 1988.8 | 663.7  | 708.1  | 50.9   | 96.8   | 4.3    |

**Table S5: Antibody concentration (in mg/mL) required for each of the six hCoV-2IG batches to achieve 50% (ID50) or 80% (ID80) neutralization of SARS-CoV-2 variants in PsVNA. Related to Figure 2.**

|            | WA-1            |                 | CA              |                 | UK              |                 | JP              |                 | SA              |                 |
|------------|-----------------|-----------------|-----------------|-----------------|-----------------|-----------------|-----------------|-----------------|-----------------|-----------------|
|            | ID50<br>(mg/mL) | ID80<br>(mg/mL) |
| hCoV-2IG-1 | 0.035           | 0.194           | 0.050           | 0.163           | 0.056           | 0.249           | 0.149           | 0.372           | 0.262           | 0.647           |
| hCoV-2IG-2 | 0.034           | 0.230           | 0.077           | 0.327           | 0.082           | 0.254           | 0.147           | 0.424           | 0.386           | 0.837           |
| hCoV-2IG-3 | 0.030           | 0.169           | 0.048           | 0.202           | 0.051           | 0.200           | 0.120           | 0.331           | 0.360           | 0.806           |
| hCoV-2IG-4 | 0.066           | 0.341           | 0.080           | 0.382           | 0.107           | 0.349           | 0.153           | 0.566           | 0.542           | 1.242           |
| hCoV-2IG-5 | 0.063           | 0.310           | 0.077           | 0.293           | 0.078           | 0.249           | 0.120           | 0.356           | 0.300           | 2.519           |
| hCoV-2IG-6 | 0.081           | 0.594           | 0.227           | 0.692           | 0.211           | 0.789           | 0.335           | 1.534           | 0.947           | 2.988           |
